# Supplementary figures and images for: Impact of postdeposition annealing on the sensing and impedance characteristics of TbYxOy electrolyte–insulator–semiconductor pH sensors
Source: Royal Society of Chemistry journal article supplement (doi:10.1039/c6ra11377j), 2016-01-01

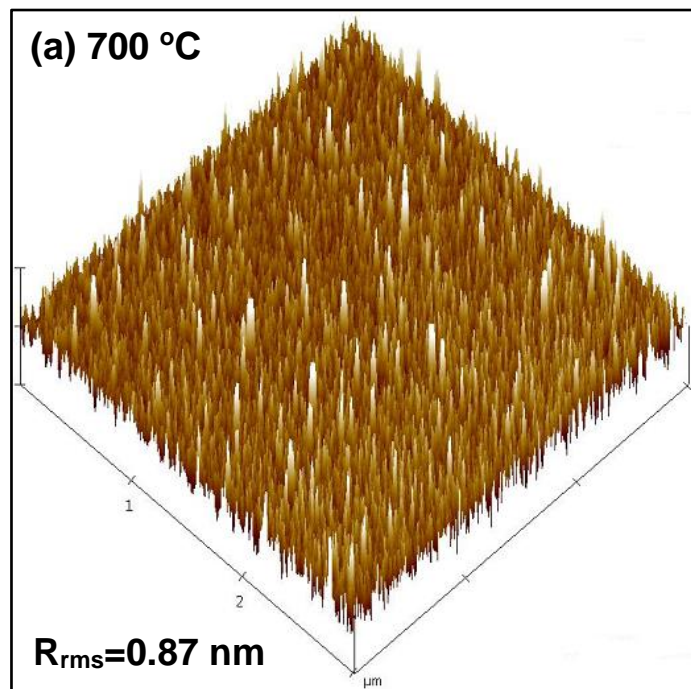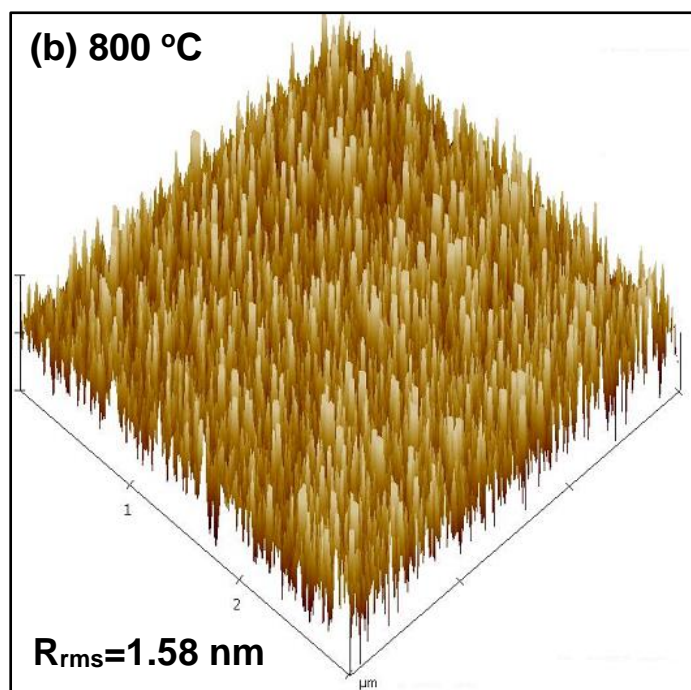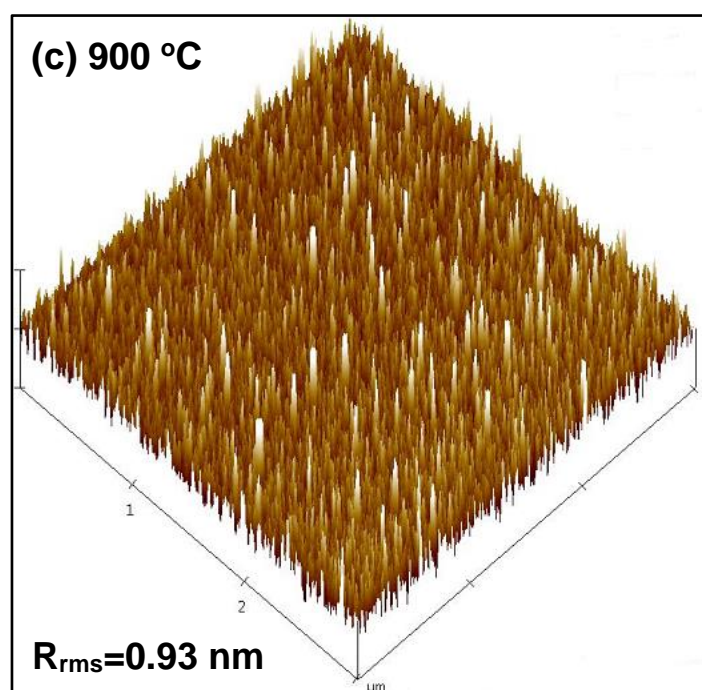

Supplement: c6ra11377j1.pdf [file c6ra11377j1.pdf]
